# Supplementary material for: Nitrogenase Gene Amplicons from Global Marine Surface Waters Are Dominated by Genes of Non-Cyanobacteria
Source: PubMed Central journal article supplement (PMC3084785; doi:10.1371/journal.pone.0019223), 2011-04-29
Supplement: pone.0019223.s004.pdf [file pone.0019223.s004.pdf]

- Cluster IV
- Cluster III
- Cluster II
- Cluster I: Cyanobacteria
- Cluster I: Proteobacteria

— 0.01

- Baffin Bay, Arctic
- Azores
- Cape Town, South Africa
- Sydney, Australia
- Fiji
- Honolulu, Hawaii
- San Diego, CA
- Concepción, Chile
- Sargasso Sea DNA1
- Sargasso Sea cDNA1
- Sargasso Sea DNA2
- Sargasso Sea cDNA2

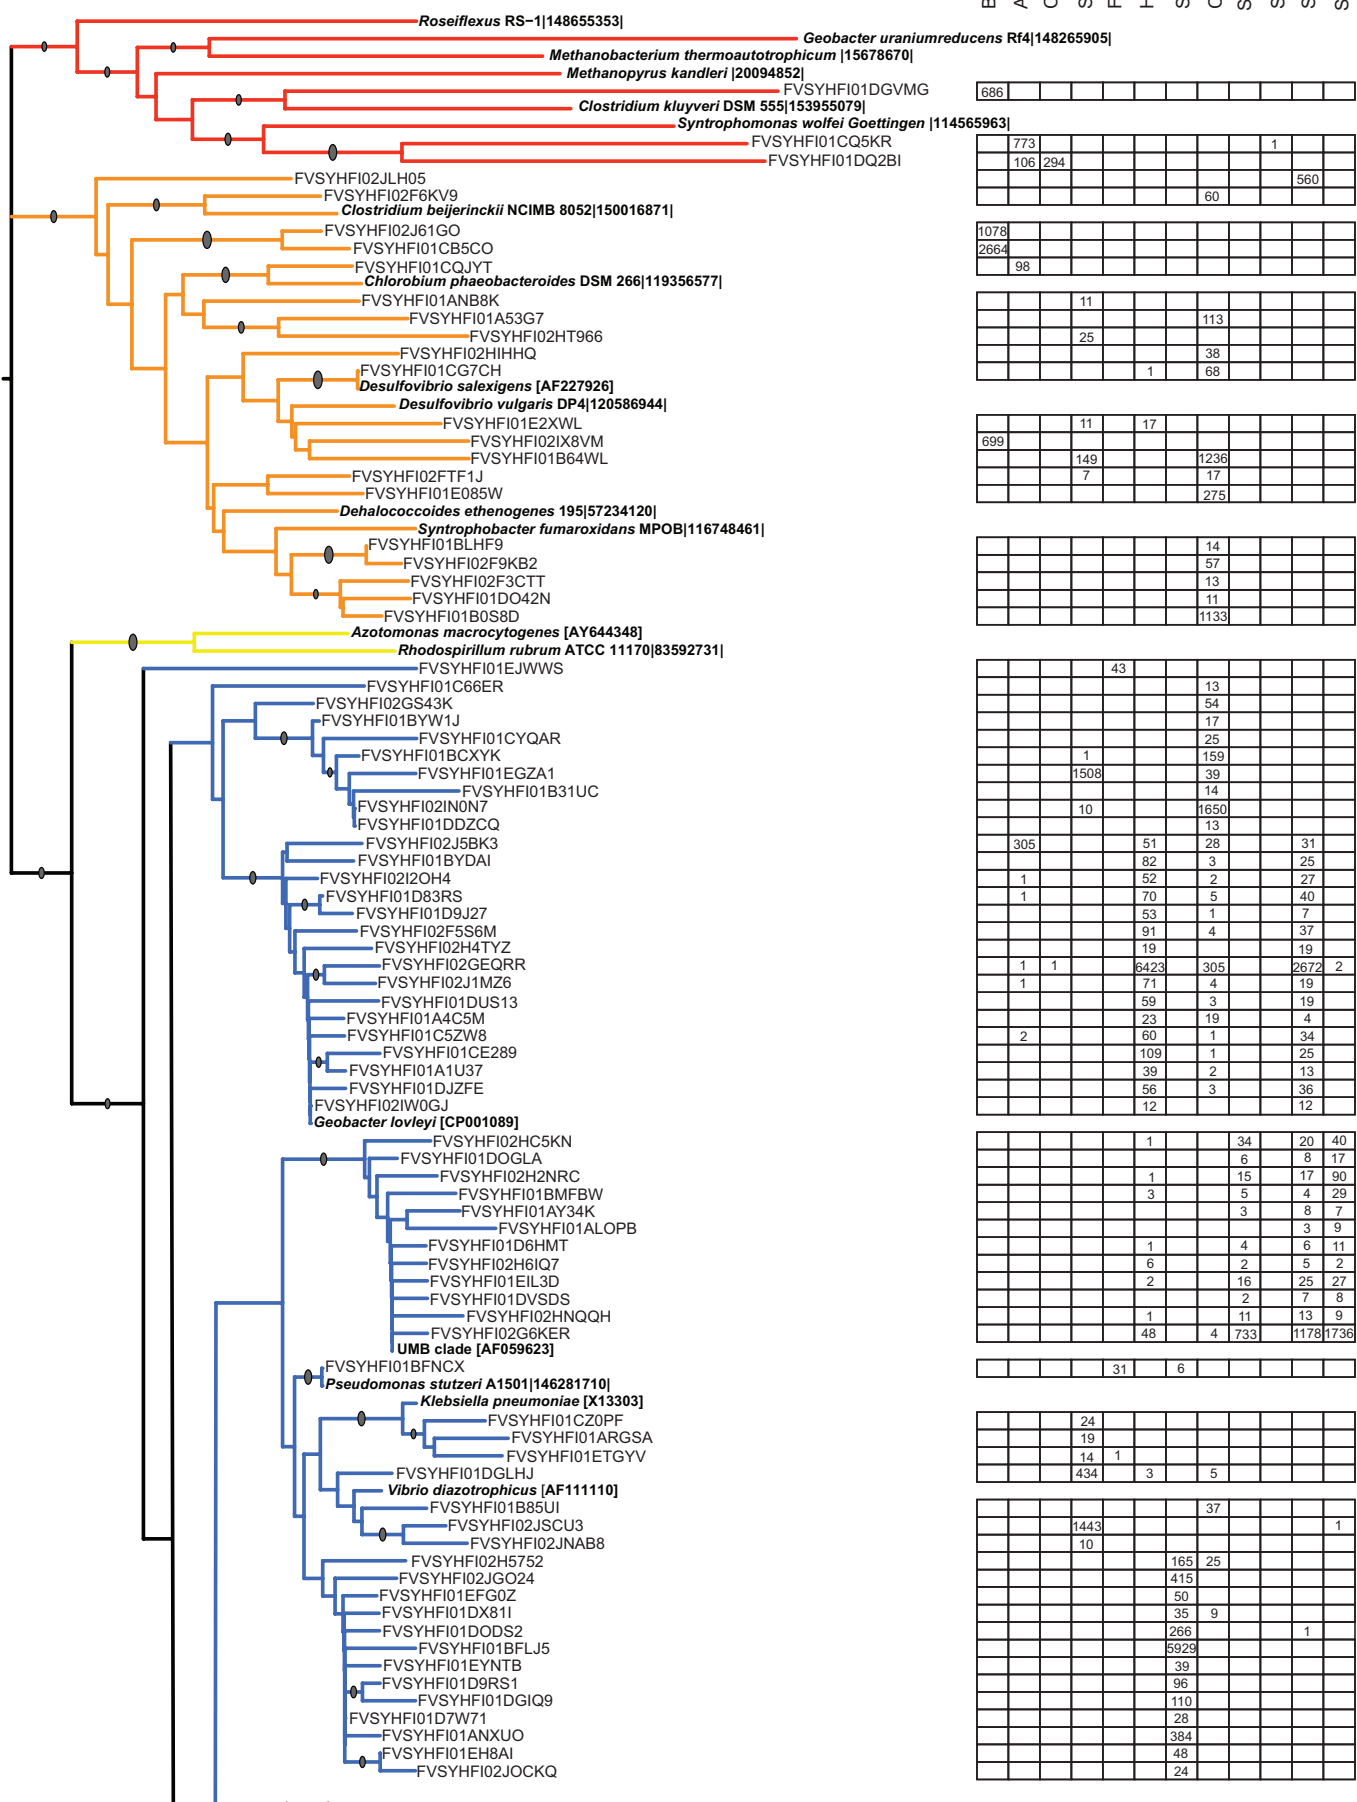

continued on next page
